# Supplementary material for: Multiangle Long-Axis Lateral Illumination Photoacoustic Imaging Using Linear Array Transducer
Source: MDPI journal article supplement (doi:10.3390/s20144052), 2020-07-21
Supplement: s1 [file s1]

Supplementary

# Multangle Long-Axis Lateral Illumination Photoacoustic Imaging Using Linear Array Transducer

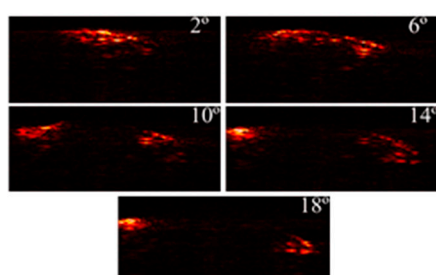

(a)

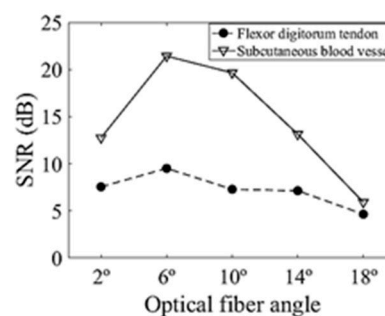

(b)

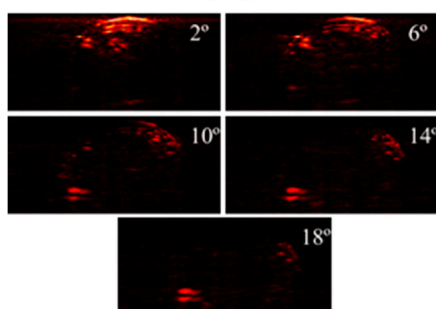

(c)

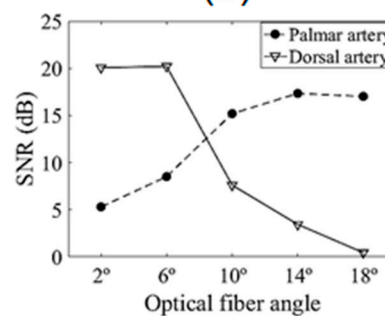

(d)

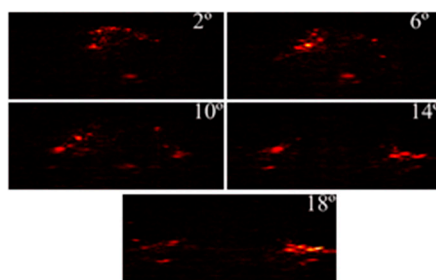

(e)

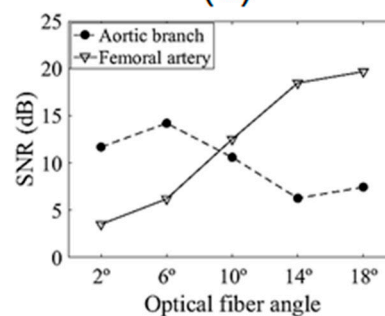

(f)

**Figure S1.** Subframes acquired at each illumination angle used to generate the *in vivo* PA images shown in Fig. 11 of the main article for the (a) forearm, (c) index finger, and (e) mouse abdomen. SNR as a function of illumination angle for each subframe of selected structures located at the (b) forearm, (d) index finger, and (f) mouse abdomen.
